# Supplementary material for: Aging and pathological aging signatures of the brain: through the focusing lens of SIRT6
Source: Aging (Albany NY). 2021 Mar 9;13(5):6420–41. doi: 10.18632/aging.202755 (PMC7993737; doi:10.18632/aging.202755)
Supplement: Supplementary Table 1 [file aging-13-202755-s002.xlsx]

## Sheet: Sheet1
Supplementary Table 1. GSEA categories assigned clusters. The cluster names assigned to each of the top 50 GSEA categories. Comparison column – the compared groups (WT, KO, Old); Type 1-3 column – the assigned cluster names; Name column – the assigned GSEA category name.
Comparison	Type 3	Type 2	Type 1	Name
down in KO (Old VS KO)			immune system	HECKER_IFNB1_TARGETS
		cell cycle	cancer	CROONQUIST_NRAS_SIGNALING_UP
		brain region	aging	LEE_AGING_CEREBELLUM_UP
			cancer	DAUER_STAT3_TARGETS_DN
		cell cycle	cancer	MARKEY_RB1_ACUTE_LOF_UP
			brain region	LEIN_PONS_MARKERS
		lipid metabolism	immune system	WUNDER_INFLAMMATORY_RESPONSE_AND_CHOLESTEROL_UP
		viruses	immune system	BOSCO_INTERFERON_INDUCED_ANTIVIRAL_MODULE
			aging	DEMAGALHAES_AGING_UP
		cancer	immune system	TAKEDA_TARGETS_OF_NUP98_HOXA9_FUSION_3D_UP
		brain region	aging	LU_AGING_BRAIN_UP
			cancer	LIU_VAV3_PROSTATE_CARCINOGENESIS_UP
		transplantation	immune system	ICHIBA_GRAFT_VERSUS_HOST_DISEASE_D7_UP
			brain region	LEIN_CHOROID_PLEXUS_MARKERS
			brain region	LEIN_MEDULLA_MARKERS
			immune system	BROWNE_INTERFERON_RESPONSIVE_GENES
		differentiation	immune system	BROWN_MYELOID_CELL_DEVELOPMENT_UP
		brain region	aging	LEE_AGING_NEOCORTEX_UP
			cancer	WALLACE_PROSTATE_CANCER_RACE_UP
			teeth decay	MCLACHLAN_DENTAL_CARIES_UP
			immune system	SANA_RESPONSE_TO_IFNG_UP
			brain region	LEIN_OLIGODENDROCYTE_MARKERS
			cell cycle	NAGASHIMA_EGF_SIGNALING_UP
		cancer	immune system	MOSERLE_IFNA_RESPONSE
			teeth decay	MCLACHLAN_DENTAL_CARIES_DN
			protein metabolism	REACTOME_PEPTIDE_CHAIN_ELONGATION
			immune system	UZONYI_RESPONSE_TO_LEUKOTRIENE_AND_THROMBIN
		cancer	immune system	TAKEDA_TARGETS_OF_NUP98_HOXA9_FUSION_10D_UP
			protein metabolism	KEGG_RIBOSOME
			epigenetic modifications	SENESE_HDAC2_TARGETS_DN
			cancer	CASORELLI_APL_SECONDARY_VS_DE_NOVO_UP
			cancer	ROSS_AML_WITH_CBFB_MYH11_FUSION
			cancer	QI_PLASMACYTOMA_UP
			cancer	SPIRA_SMOKERS_LUNG_CANCER_UP
		immune system	cancer	DER_IFN_ALPHA_RESPONSE_UP
		cell cycle	cancer	CROONQUIST_NRAS_VS_STROMAL_STIMULATION_UP
			mental disorders	ASTON_MAJOR_DEPRESSIVE_DISORDER_DN
			immune system	LI_INDUCED_T_TO_NATURAL_KILLER_UP
			cell cycle	GRAHAM_NORMAL_QUIESCENT_VS_NORMAL_DIVIDING_UP
		viruses	immune system	WIELAND_UP_BY_HBV_INFECTION
		transplantation	immune system	ICHIBA_GRAFT_VERSUS_HOST_DISEASE_35D_UP
		immune system	telomeres	ROETH_TERT_TARGETS_UP
			immune system	REACTOME_INTERFERON_GAMMA_SIGNALING
		cancer	cell cycle	GRAHAM_CML_DIVIDING_VS_NORMAL_QUIESCENT_DN
			immune system	LIAN_LIPA_TARGETS_3M
		drug resistance	cancer	PATTERSON_DOCETAXEL_RESISTANCE
			telomeres	SMITH_TERT_TARGETS_DN
			fertility	YAO_TEMPORAL_RESPONSE_TO_PROGESTERONE_CLUSTER_9
		cancer	immune system	TAKEDA_TARGETS_OF_NUP98_HOXA9_FUSION_8D_UP
			immune system	HINATA_NFKB_TARGETS_KERATINOCYTE_DN
Up in KO (KO VS old)			cell cycle	FUJIWARA_PARK2_HEPATOCYTE_PROLIFERATION_DN
			heart	BIOCARTA_ACE2_PATHWAY
			cancer	SCHLINGEMANN_SKIN_CARCINOGENESIS_TPA_DN
		cell cycle	differentiation	KUNINGER_IGF1_VS_PDGFB_TARGETS_UP
		adipose tissue	differentiation	BURTON_ADIPOGENESIS_3
		adipose tissue	differentiation	VERNOCHET_ADIPOGENESIS
	learning	brain development	differentiation	REACTOME_CRMPS_IN_SEMA3A_SIGNALING
		cancer	cell cycle	ZHAN_MULTIPLE_MYELOMA_PR_UP
		cancer	cell cycle	REICHERT_G1S_REGULATORS_AS_PI3K_TARGETS
			cell-cell interaction	REACTOME_NEPHRIN_INTERACTIONS
			cell cycle	REACTOME_G1_S_SPECIFIC_TRANSCRIPTION
		DNA stability	cell cycle	ZHOU_CELL_CYCLE_GENES_IN_IR_RESPONSE_6HR
			cancer	KOMMAGANI_TP63_GAMMA_TARGETS
		cell cycle	cancer	KUMAMOTO_RESPONSE_TO_NUTLIN_3A_DN
		serum stimulation	cell cycle	KONG_E2F3_TARGETS
		neural system	cell-cell interaction	PID_SYNDECAN_3_PATHWAY
		epigenetic modifications	genomic imprint	BRIDEAU_IMPRINTED_GENES
			cancer	LOPEZ_MESOTHELIOMA_SURVIVAL_DN
		epigenetic modifications	H327me3	MIKKELSEN_IPS_LCP_WITH_H3K27ME3
			insulin signaling (~)	SARTIPY_NORMAL_AT_INSULIN_RESISTANCE_DN
		DNA stability	cancer	HASLINGER_B_CLL_WITH_17P13_DELETION
			glucose metabolism	MOOTHA_GLYCOLYSIS
			brain development	BIOCARTA_VITCB_PATHWAY
			cell cycle	IGLESIAS_E2F_TARGETS_DN
			DNA stability	REACTOME_REPAIR_SYNTHESIS_FOR_GAP_FILLING_BY_DNA_POL_IN_TC_NER
			heart	BIOCARTA_AMI_PATHWAY
		drug resistance	cancer	BIOCARTA_STATHMIN_PATHWAY
	epigenetic modifications	DNA methylation	cancer	KINNEY_DNMT1_METHYLATION_TARGETS
			cell-cell interaction	REACTOME_CTNNB1_PHOSPHORYLATION_CASCADE
		DNA stability	cancer	MYLLYKANGAS_AMPLIFICATION_HOT_SPOT_27
			Sodium metabolism	KEGG_ALDOSTERONE_REGULATED_SODIUM_REABSORPTION
			cell-cell interaction	VERRECCHIA_RESPONSE_TO_TGFB1_C1
			cancer	CROMER_TUMORIGENESIS_DN
		cell cycle	cancer	ROSTY_CERVICAL_CANCER_PROLIFERATION_CLUSTER
	neuronal system	epigenetic modifications	H3 unmethylation	MEISSNER_BRAIN_HCP_WITH_H3_UNMETHYLATED
			cell cycle	WHITFIELD_CELL_CYCLE_LITERATURE
			cancer	XU_HGF_TARGETS_INDUCED_BY_AKT1_48HR_DN
		DNA stability	apoptosis	BIOCARTA_DNAFRAGMENT_PATHWAY
			differentiation	DELASERNA_MYOD_TARGETS_UP
			cancer	NAKAMURA_CANCER_MICROENVIRONMENT_UP
			heart	THUM_MIR21_TARGETS_HEART_DISEASE_UP
			cancer	FARMER_BREAST_CANCER_CLUSTER_5
		epigenetic modifications	cancer	LIANG_SILENCED_BY_METHYLATION_DN
		drug resistance	cancer	LI_CISPLATIN_RESISTANCE_DN
			cancer	DING_LUNG_CANCER_MUTATED_FREQUENTLY
			apoptosis	RAMJAUN_APOPTOSIS_BY_TGFB1_VIA_SMAD4_DN
		cancer	cell cycle	EGUCHI_CELL_CYCLE_RB1_TARGETS
			glucose metabolism	REACTOME_GLUCONEOGENESIS
	learning	brain development	cell-cell interaction	PID_REELINPATHWAY
			lipid metabolism	KEGG_ALPHA_LINOLENIC_ACID_METABOLISM
up in KO (KO vs WT)		Cell cycle	DNA synthesis	REACTOME_SYNTHESIS_OF_DNA
		Cell cycle	DNA synthesis	REACTOME_ORC1_REMOVAL_FROM_CHROMATIN
			p53 RE	INGA_TP53_TARGETS
		Cell cycle	DNA synthesis	REACTOME_CDT1_ASSOCIATION_WITH_THE_CDC6_ORC_ORIGIN_COMPLEX
			cell cycle	REACTOME_SCFSKP2_MEDIATED_DEGRADATION_OF_P27_P21
			metabolism	KEGG_TYROSINE_METABOLISM
			immune system	BIOCARTA_CLASSIC_PATHWAY
			cancer	RICKMAN_HEAD_AND_NECK_CANCER_F
			cancer	STAMBOLSKY_RESPONSE_TO_VITAMIN_D3_DN
			cell cycle	REACTOME_SCF_BETA_TRCP_MEDIATED_DEGRADATION_OF_EMI1
			cancer	YAMASHITA_LIVER_CANCER_WITH_EPCAM_DN
		cell cycle	differentiation	BAKKER_FOXO3_TARGETS_UP
			DNA synthesis	REACTOME_ASSEMBLY_OF_THE_PRE_REPLICATIVE_COMPLEX
			metabolism	REACTOME_TRYPTOPHAN_CATABOLISM
		cell cycle	cancer	HASINA_NOL7_TARGETS_UP
			cell cycle	REACTOME_M_G1_TRANSITION
		cell cycle	differentiation	KUNINGER_IGF1_VS_PDGFB_TARGETS_UP
		DNA stability	cell cycle	REACTOME_P53_DEPENDENT_G1_DNA_DAMAGE_RESPONSE
		DNA synthesis	cell cycle	REACTOME_S_PHASE
			cell cycle	REACTOME_ASSOCIATION_OF_LICENSING_FACTORS_WITH_THE_PRE_REPLICATIVE_COMPLEX
			cell cycle	REACTOME_G1_S_TRANSITION
		DNA synthesis	cell cycle	REACTOME_CDK_MEDIATED_PHOSPHORYLATION_AND_REMOVAL_OF_CDC6
			cancer	CROMER_TUMORIGENESIS_DN
			cancer	PYEON_CANCER_HEAD_AND_NECK_VS_CERVICAL_DN
			protein metabolism	REACTOME_FORMATION_OF_THE_TERNARY_COMPLEX_AND_SUBSEQUENTLY_THE_43S_COMPLEX
			cell cycle	REACTOME_CYCLIN_E_ASSOCIATED_EVENTS_DURING_G1_S_TRANSITION_
			cancer	WINNEPENNINCKX_MELANOMA_METASTASIS_DN
			RNA metabolism	REACTOME_DESTABILIZATION_OF_MRNA_BY_AUF1_HNRNP_D0
			cancer	XU_HGF_TARGETS_REPRESSED_BY_AKT1_UP
		cell cycle	DNA synthesis	REACTOME_CDC6_ASSOCIATION_WITH_THE_ORC_ORIGIN_COMPLEX
			immune system	REACTOME_ACTIVATION_OF_NF_KAPPAB_IN_B_CELLS
			viruses	REACTOME_INFLUENZA_VIRAL_RNA_TRANSCRIPTION_AND_REPLICATION
			RNA metabolism	REACTOME_NONSENSE_MEDIATED_DECAY_ENHANCED_BY_THE_EXON_JUNCTION_COMPLEX
			protein metabolism	REACTOME_PEPTIDE_CHAIN_ELONGATION
		cell cycle	DNA stability	REACTOME_AUTODEGRADATION_OF_THE_E3_UBIQUITIN_LIGASE_COP1
			viruses	REACTOME_VIF_MEDIATED_DEGRADATION_OF_APOBEC3G
			circadian clock	KEGG_CIRCADIAN_RHYTHM_MAMMAL
			cancer	SUZUKI_RESPONSE_TO_TSA_AND_DECITABINE_1B
		cell cycle	cancer	LEE_LIVER_CANCER_E2F1_UP
		cell cycle	DNA synthesis	REACTOME_E2F_MEDIATED_REGULATION_OF_DNA_REPLICATION
			protein metabolism	KEGG_RIBOSOME
		cell-cell interaction	cancer	ONDER_CDH1_TARGETS_3_UP
			muscle contraction	REACTOME_STRIATED_MUSCLE_CONTRACTION
		DNA stability	cell cycle	REACTOME_P53_INDEPENDENT_G1_S_DNA_DAMAGE_CHECKPOINT
			protein metabolism	REACTOME_3_UTR_MEDIATED_TRANSLATIONAL_REGULATION
			adipose tissue	BOQUEST_STEM_CELL_CULTURED_VS_FRESH_DN
			cancer	SARRIO_EPITHELIAL_MESENCHYMAL_TRANSITION_DN
			cell cycle	REACTOME_G1_S_SPECIFIC_TRANSCRIPTION
			protein metabolism	REACTOME_ACTIVATION_OF_THE_MRNA_UPON_BINDING_OF_THE_CAP_BINDING_COMPLEX_AND_EIFS_AND_SUBSEQUENT_BINDING_TO_43S
			cancer	OXFORD_RALA_AND_RALB_TARGETS_DN
down in KO (WT vs KO)			development	SCHMIDT_POR_TARGETS_IN_LIMB_BUD_UP
		learning	mental disorders	MCCLUNG_CREB1_TARGETS_UP
			brain region	LEIN_OLIGODENDROCYTE_MARKERS
			lipid metabolism	HORTON_SREBF_TARGETS
		cell cycle	cancer	CROONQUIST_NRAS_VS_STROMAL_STIMULATION_UP
			lipid metabolism	REACTOME_CHOLESTEROL_BIOSYNTHESIS
			neuronal system	REACTOME_POTASSIUM_CHANNELS
			brain region	LEIN_ASTROCYTE_MARKERS
			neuronal system	REACTOME_VOLTAGE_GATED_POTASSIUM_CHANNELS
			telomeres	SMITH_TERT_TARGETS_DN
			cancer	CLAUS_PGR_POSITIVE_MENINGIOMA_DN
			cancer	PICCALUGA_ANGIOIMMUNOBLASTIC_LYMPHOMA_UP
			differentiation	AMIT_EGF_RESPONSE_240_MCF10A
		gene regulation?????	cell cycle	SENESE_HDAC1_AND_HDAC2_TARGETS_DN
			development	VANDESLUIS_COMMD1_TARGETS_GROUP_4_DN
			neuronal system	REACTOME_NEURONAL_SYSTEM
			brain region	LEIN_MEDULLA_MARKERS
		protein metabolism	mental disorders	REACTOME_AMYLOIDS
		immune system	cancer	SASAKI_ADULT_T_CELL_LEUKEMIA
			cancer	TONKS_TARGETS_OF_RUNX1_RUNX1T1_FUSION_HSC_DN
			lipid metabolism	REACTOME_FATTY_ACYL_COA_BIOSYNTHESIS
			brain region	LEIN_PONS_MARKERS
			telomeres	KANG_IMMORTALIZED_BY_TERT_DN
			mental disorders	ASTON_MAJOR_DEPRESSIVE_DISORDER_DN
			fertility	MATZUK_EMBRYONIC_GERM_CELL
		cell-cell interaction	neuronal system	REACTOME_ADENYLATE_CYCLASE_INHIBITORY_PATHWAY
		protein metabolism	RNA metabolism	REACTOME_RNA_POL_I_PROMOTER_OPENING
			cancer	LINDGREN_BLADDER_CANCER_HIGH_RECURRENCE
			epigenetic modifications	SENESE_HDAC2_TARGETS_DN
		cell-cell communication	neuronal system	KEGG_NEUROACTIVE_LIGAND_RECEPTOR_INTERACTION
			apoptosis	MARTORIATI_MDM4_TARGETS_NEUROEPITHELIUM_DN
			cancer	NAKAMURA_TUMOR_ZONE_PERIPHERAL_VS_CENTRAL_UP
			lipid metabolism	KEGG_STEROID_BIOSYNTHESIS
	immune system	learning	brain development	REACTOME_OTHER_SEMAPHORIN_INTERACTIONS
		learning	mental disorders	MCCLUNG_DELTA_FOSB_TARGETS_2WK
			cell-cell interaction	KEGG_GAP_JUNCTION
			immune system	PETROVA_ENDOTHELIUM_LYMPHATIC_VS_BLOOD_UP
		differentiation	cell cycle	NAKAYAMA_FGF2_TARGETS
			glucose metabolism	KEGG_PYRUVATE_METABOLISM
			metabolism	REACTOME_HYALURONAN_METABOLISM
			homeostasis ??	REACTOME_CGMP_EFFECTS
			brain development	LE_EGR2_TARGETS_DN
			cancer	LIAO_HAVE_SOX4_BINDING_SITES
			cell-cell interaction	REACTOME_NUCLEOTIDE_LIKE_PURINERGIC_RECEPTORS
		cell-cell interaction	neuronal system	REACTOME_ADENYLATE_CYCLASE_ACTIVATING_PATHWAY
	H3K4me3	epigenetic modifications	H3K27me3	MIKKELSEN_MEF_ICP_WITH_H3K4ME3_AND_H3K27ME3
			muscle contraction	REACTOME_SMOOTH_MUSCLE_CONTRACTION
			brain development	LIN_NPAS4_TARGETS_DN
	cancer	epigenetic modifications	H3K4me2/3 demethylation	SCIBETTA_KDM5B_TARGETS_DN
			cell-cell interaction	REACTOME_CLASS_C_3_METABOTROPIC_GLUTAMATE_PHEROMONE_RECEPTORS
down in old (WT VS old)		PTEN tragets	cancer	HE_PTEN_TARGETS_UP
		cancer	cell cycle	REICHERT_MITOSIS_LIN9_TARGETS
		cancer	cell cycle	ZHAN_MULTIPLE_MYELOMA_PR_UP
			cell cycle	FUJIWARA_PARK2_HEPATOCYTE_PROLIFERATION_DN
			cancer	SMID_BREAST_CANCER_LUMINAL_A_DN
	learning	cell-cell communication	brain development	REACTOME_NCAM1_INTERACTIONS
			cancer	LI_WILMS_TUMOR_ANAPLASTIC_UP
	adipose tissue	differentiation	cancer	NAKAYAMA_SOFT_TISSUE_TUMORS_PCA2_UP
	learning	brain development	differentiation	REACTOME_CRMPS_IN_SEMA3A_SIGNALING
		adipose tissue	differentiation	BURTON_ADIPOGENESIS_3
		cell cycle	cancer	KUMAMOTO_RESPONSE_TO_NUTLIN_3A_DN
			cancer	NAKAMURA_CANCER_MICROENVIRONMENT_UP
			cancer	YU_MYC_TARGETS_UP
	epigenetic modifications	DNA methylation	cancer	KINNEY_DNMT1_METHYLATION_TARGETS
	learning	cell-cell interaction	brain development	REACTOME_NCAM_SIGNALING_FOR_NEURITE_OUT_GROWTH
			cancer	SCHLINGEMANN_SKIN_CARCINOGENESIS_TPA_DN
		serum stimulation	cell cycle	KONG_E2F3_TARGETS
			cell-cell interaction	REACTOME_CLASS_C_3_METABOTROPIC_GLUTAMATE_PHEROMONE_RECEPTORS
		cell cycle	cancer	ROSTY_CERVICAL_CANCER_PROLIFERATION_CLUSTER
		epigenetic modifications	cancer	LIANG_SILENCED_BY_METHYLATION_DN
		cancer	cell cycle	REICHERT_G1S_REGULATORS_AS_PI3K_TARGETS
			aging	LY_AGING_MIDDLE_DN
			cancer	LIAO_HAVE_SOX4_BINDING_SITES
			cancer	XU_HGF_TARGETS_INDUCED_BY_AKT1_48HR_DN
	neuronal system	circadian clock	cell-cell interaction	REACTOME_OPSINS
			cancer	SASAI_TARGETS_OF_CXCR6_AND_PTCH1_UP
		development	cancer	HUI_MAPK14_TARGETS_UP
		immune system	cancer	MORI_IMMATURE_B_LYMPHOCYTE_DN
		cell-cell interaction	cancer	GUENTHER_GROWTH_SPHERICAL_VS_ADHERENT_UP
			development	HOWLIN_CITED1_TARGETS_1_UP
			brain development	BIOCARTA_VITCB_PATHWAY
			cancer	NIELSEN_GIST_VS_SYNOVIAL_SARCOMA_UP
			cell cycle	WHITFIELD_CELL_CYCLE_LITERATURE
			immune system	LEE_EARLY_T_LYMPHOCYTE_UP
			fertility	YAO_TEMPORAL_RESPONSE_TO_PROGESTERONE_CLUSTER_16
			aging	DEMAGALHAES_AGING_DN
		neuronal system	learning	KEGG_AXON_GUIDANCE
			immune system	HOEGERKORP_CD44_TARGETS_TEMPORAL_UP
			brain development	MODY_HIPPOCAMPUS_NEONATAL
			development	PIONTEK_PKD1_TARGETS_DN
	DNA stability	cancer	cell cycle	CHIANG_LIVER_CANCER_SUBCLASS_PROLIFERATION_UP
		protein metabolism	mental disorder	BIOCARTA_PLATELETAPP_PATHWAY
			cell cycle	IGLESIAS_E2F_TARGETS_DN
			fertility	MATZUK_FERTILIZATION
			cancer	WHITEFORD_PEDIATRIC_CANCER_MARKERS
			cell cycle	REACTOME_PHOSPHORYLATION_OF_THE_APC_C
			cancer	FERRANDO_HOX11_NEIGHBORS
			apoptosis	RAMJAUN_APOPTOSIS_BY_TGFB1_VIA_SMAD4_DN
		drug resistance	cancer	BIOCARTA_STATHMIN_PATHWAY
			cancer	INAMURA_LUNG_CANCER_SCC_UP
up in old (Old VS WT)		transplantation	immune system	ICHIBA_GRAFT_VERSUS_HOST_DISEASE_D7_UP
			aging	DEMAGALHAES_AGING_UP
			cancer	DAUER_STAT3_TARGETS_DN
			immune system	HECKER_IFNB1_TARGETS
			protein metabolism	REACTOME_PEPTIDE_CHAIN_ELONGATION
			protein metabolism	KEGG_RIBOSOME
			RNA metabolism	REACTOME_NONSENSE_MEDIATED_DECAY_ENHANCED_BY_THE_EXON_JUNCTION_COMPLEX
			teeth decay	MCLACHLAN_DENTAL_CARIES_UP
			protein metabolism	REACTOME_3_UTR_MEDIATED_TRANSLATIONAL_REGULATION
			viruses	REACTOME_INFLUENZA_VIRAL_RNA_TRANSCRIPTION_AND_REPLICATION
			transplantation	FLECHNER_BIOPSY_KIDNEY_TRANSPLANT_REJECTED_VS_OK_UP
			cancer	LIU_VAV3_PROSTATE_CARCINOGENESIS_UP
		cell cycle	cancer	MARKEY_RB1_ACUTE_LOF_UP
		brain region	aging	LEE_AGING_CEREBELLUM_UP
		differentiation	immune system	BROWN_MYELOID_CELL_DEVELOPMENT_UP
			protein metabolism	REACTOME_SRP_DEPENDENT_COTRANSLATIONAL_PROTEIN_TARGETING_TO_MEMBRANE
			immune system	SANA_RESPONSE_TO_IFNG_UP
			immune system	BROWNE_INTERFERON_RESPONSIVE_GENES
		cancer	immune system	MOSERLE_IFNA_RESPONSE
			cancer	WALLACE_PROSTATE_CANCER_RACE_UP
		viruses	immune system	BOSCO_INTERFERON_INDUCED_ANTIVIRAL_MODULE
			viruses	REACTOME_INFLUENZA_LIFE_CYCLE
		lipid metabolism	immune system	WUNDER_INFLAMMATORY_RESPONSE_AND_CHOLESTEROL_UP
		cancer	immune system	TAKEDA_TARGETS_OF_NUP98_HOXA9_FUSION_3D_UP
			protein metabolism	REACTOME_TRANSLATION
		viruses	immune system	WIELAND_UP_BY_HBV_INFECTION
			brain region	LEIN_CHOROID_PLEXUS_MARKERS
		cell cycle	cancer	CROONQUIST_NRAS_SIGNALING_UP
		immune system	cancer	DER_IFN_ALPHA_RESPONSE_UP
			RNA metabolism	REACTOME_METABOLISM_OF_MRNA
		immune system	cancer	DER_IFN_BETA_RESPONSE_UP
		immune system	cancer	EINAV_INTERFERON_SIGNATURE_IN_CANCER
			RNA metabolism	REACTOME_METABOLISM_OF_RNA
		drug resistance	cancer	BECKER_TAMOXIFEN_RESISTANCE_UP
		immune system	cancer	DER_IFN_GAMMA_RESPONSE_UP
			viruses	ZHANG_ANTIVIRAL_RESPONSE_TO_RIBAVIRIN_UP
		rapamycin	serum starvation	BILANGES_SERUM_AND_RAPAMYCIN_SENSITIVE_GENES
		cancer	immune system	RADAEVA_RESPONSE_TO_IFNA1_UP
			teeth decay	MCLACHLAN_DENTAL_CARIES_DN
		immune system	cancer	MORI_LARGE_PRE_BII_LYMPHOCYTE_DN
			protein metabolism	REACTOME_ACTIVATION_OF_THE_MRNA_UPON_BINDING_OF_THE_CAP_BINDING_COMPLEX_AND_EIFS_AND_SUBSEQUENT_BINDING_TO_43S
			cancer	BOYLAN_MULTIPLE_MYELOMA_PCA1_UP
		immune system	telomeres	ROETH_TERT_TARGETS_UP
			protein metabolism	REACTOME_FORMATION_OF_THE_TERNARY_COMPLEX_AND_SUBSEQUENTLY_THE_43S_COMPLEX
			brain region	LEIN_PONS_MARKERS
			lipid metabolism	MOOTHA_FFA_OXYDATION
		transplantation	immune system	ICHIBA_GRAFT_VERSUS_HOST_DISEASE_35D_UP
			cancer	YU_MYC_TARGETS_DN
		brain region	aging	LEE_AGING_NEOCORTEX_UP
		cancer	immune system	KIM_LRRC3B_TARGETS
