# Supplementary material for: Aging and pathological aging signatures of the brain: through the focusing lens of SIRT6
Source: Aging (Albany NY). 2021 Mar 9;13(5):6420–41. doi: 10.18632/aging.202755 (PMC7993737; doi:10.18632/aging.202755)
Supplement: Supplementary Table 2 [file aging-13-202755-s003.pdf]

**Supplementary Table 2. GSEA clusters summarizing table.**

| comparison name          | WT vs KO      | WT vs old     | Old vs KO         | KO vs WT    | old vs WT   | KO vs Old         |
|--------------------------|---------------|---------------|-------------------|-------------|-------------|-------------------|
| direction                | downregulated | downregulated | downregulated     | upregulated | upregulated | upregulated       |
| up/down in               | KO            | Old           | KO (comp. to Old) | KO          | Old         | KO (comp. to Old) |
| immune system            | 3             | 3             | 20                | 2           | 19          | 0                 |
| protein translation      | 1             | 0             | 2                 | 5           | 7           | 0                 |
| proteostasis             | 1             | 1             | 0                 | 0           | 0           | 0                 |
| RNA metabolism           | 1             | 0             | 0                 | 2           | 3           | 0                 |
| lipid metabolism         | 4             | 0             | 1                 | 0           | 2           | 1                 |
| aging                    | 0             | 2             | 4                 | 0           | 3           | 0                 |
| cell cycle               | 3             | 11            | 6                 | 21          | 2           | 12                |
| differentiation          | 2             | 3             | 1                 | 2           | 1           | 5                 |
| brain region             | 4             | 0             | 7                 | 0           | 4           | 0                 |
| brain development        | 3             | 5             | 0                 | 0           | 0           | 3                 |
| genomic instability      | 0             | 1             | 0                 | 3           | 0           | 5                 |
| DNA synthesis            | 0             | 0             | 0                 | 8           | 0           | 0                 |
| epigenetic modifications | 4             | 2             | 1                 | 0           | 0           | 5                 |
| development              | 2             | 3             | 0                 | 0           | 0           | 0                 |
| learning                 | 3             | 4             | 0                 | 0           | 0           | 2                 |
| neuronal system          | 6             | 2             | 0                 | 0           | 0           | 2                 |
| cell-cell interaction    | 6             | 5             | 0                 | 1           | 0           | 5                 |
| <b>cancer</b>            | <b>9</b>      | <b>26</b>     | <b>17</b>         | <b>13</b>   | <b>17</b>   | <b>19</b>         |
| <b>Others 1</b>          | <b>9</b>      | <b>8</b>      | <b>6</b>          | <b>6</b>    | <b>5</b>    | <b>9</b>          |
| <b>Others 2</b>          | <b>0</b>      | <b>1</b>      | <b>5</b>          | <b>2</b>    | <b>9</b>    | <b>5</b>          |
