# Supplementary material for: Aging and pathological aging signatures of the brain: through the focusing lens of SIRT6
Source: Aging (Albany NY). 2021 Mar 9;13(5):6420–41. doi: 10.18632/aging.202755 (PMC7993737; doi:10.18632/aging.202755)
Supplement: Supplementary Table 3 [file aging-13-202755-s004.xlsx]

## Sheet: 20.12.08 - P3-S0 - SIRT6KO diff
Supplementary Table 3. Differentially expressed genes in SIRT6KO mice brains.
increase in SIRT6KO	decrease in SIRT6KO
1500012F01Rik	1700057H15Rik
1700018B24Rik	6530418L21Rik
1700022K14Rik	Abi3bp
1700092K14Rik	Acvr1c
1700093K21Rik	Adam19
1810020O05Rik	Apln
2010005H15Rik	Bcs1l
2700046A07Rik	C130026L21Rik
2810410L24Rik	Catspere2
4930500J02Rik	Ccdc111
4930570G19Rik	Ceacam1
4930578I07Rik	Chrna5
4931428L18Rik	Cml5
4933406C10Rik	Cmtm5
5830473C10Rik	Cnmd
8430436N08Rik	Crh
9030224M15Rik	Cyp27a1
9330185C12Rik	Cyp2r1
Abca12	Defa27
Acr	Dleu2
Agt	Dlx1as
Albfm1	Ear-ps2
Alox12b	Emcn
Aloxe3	Ephx2
Amy1	Erich6
Ap1g2	Ermn
Apoc1	Evi2a
Arhgap11a	Fabp7
Arrdc1	Fam194a
Arrdc4	Fcrls
BC018473	G6pd2
BC039966	Gcnt4
BC051142	Gm10492
C4b	Gm11128
Ccdc129	Gm11274
Ccl17	Gm11398
Cdkn1a	Gm11578
Chrna1	Gm12940
Cirbp	Gm13502
Clcnka	Gm13783
Cmtm2a	Gm14097
Cps1	Gm14975
Cstdc4	Gm15299
Dach2	Gm15397
Dbh	Gm15521
Dcstamp	Gm15663
Diap3	Gm16432
Diaph3	Gm16965
Dpt	Gm17149
Fkbp5	Gm17655
G630018N14Rik	Gm20393
Gabrr2	Gm3160
Galnt15	Gm7876
Galntl2	Gpr34
Gcg	H2bc12
Gemin4	Hapln4
Glcci1	Hist1h2bk
Glycam1	Hsph1
Gm10156	Ighm
Gm10436	Inka2
Gm11019	Itgam
Gm11346	Kctd21
Gm11827	Klk6
Gm12072	Lcat
Gm12472	Lect1
Gm12613	Lrrk2
Gm12621	Masp2
Gm12624	Mkks
Gm12965	Mrrf
Gm13210	Nat8f5
Gm14231	Nat8f6
Gm14858	Nexn
Gm15014	Ninj2
Gm15094	Olfml3
Gm15453	Olfr175
Gm15691	Olfr175-ps1
Gm20405	Opn3
Gm23650	P2ry12
Gm5483	Phkg1
Gm6634	Pla2g4a
Gm6816	Pltp
Gm8369	Plxnb3
Gm8619	Primpol
Gm9871	Pth2r
Gsta3	Pycr1
H2-D1	Rdh5
Hif3a	Rlbp1
Hmgcs2	Rnpep
Hsd11b1	Selplg
Ifitm2	Sirt6
Igbp1b	Slc16a4
Igfbp3	Slc16a6
Il4	Slc16a7
Itprid1	Slc22a8
Kbtbd5	Slc38a5
Klf15	Slc47a1
Klhl40	Sp100
Klk1b22	Ttpa
Lncenc1	Vmn2r84
Lsp1	Vmn2r85
Matn1	Vmn2r86
Mettl24	Vmn2r87
Mir219-2	Wdr78
Mir219a-2
Mir411
Mir99a
Mirlet7d
Mkrn3
Morc1
Ms4a6b
Myl1
Myl4
Mymk
Ncrna00085
Neat1
Neb
Olfr1402
Olfr705
Ovgp1
Pgam2
Phf2os1
Pilrb2
Pla2g3
Platr14
Plin4
Pnpla2
RP23-167B4.2
Rad18
Rbm3
Rps4l
Rps4l-ps
Rps4y2
SNORD56
Sat2
Sbsn
Scgb3a1
Scrg1
Sln
Spaca6
Spink8
Stfa1
Stfa2
Stfa2l1
Sult1a1
Tdo2
Tm7sf4
Tmem232
Tmem8c
Trp53inp1
Txnip
Ugt1a6a
Vmn2r1
Vmn2r3
Wfikkn2
Xpa
Zfas1
