# Supplementary material for: Aging and pathological aging signatures of the brain: through the focusing lens of SIRT6
Source: Aging (Albany NY). 2021 Mar 9;13(5):6420–41. doi: 10.18632/aging.202755 (PMC7993737; doi:10.18632/aging.202755)
Supplement: Supplementary Table 5 [file aging-13-202755-s006.xlsx]

## Sheet: Sheet1
Supplementary Table 5. SIRT6KO-affected genes – neurodegeneration and reversibility scores. A summarizing table of all the genes differentially expressed in SIRT6KO mice brains, and their Neurodegeneration Score (ND Score) and Reversibility Score (REV Score). Red – positive values; blue – negative values.
GeneName	ND Score	REV Score	Trend in SIRT6KO mice brains
1500012F01Rik	-0.833333	0.833333	increase
2700046A07Rik	0	0	increase
2810410L24Rik	-0.5	0.5	increase
Acr	0	0	increase
Aloxe3	0	0	increase
Amy1	-0.75	0.75	increase
Ap1g2	0	0	increase
Apoc1	0	0	increase
Arhgap11a	0	0	increase
Arrdc1	0	-1	increase
Arrdc4	0	0	increase
C4b	0	0	increase
Ccl17	0	1	increase
Cdkn1a	0	1	increase
Cirbp	-0.5	1.5	increase
Clcnka	0	0	increase
Cps1	0	0	increase
Dbh	0	0	increase
Dpt	0	0	increase
Fkbp5	0	1	increase
Gemin4	-0.5	0.5	increase
Glcci1	0	-1	increase
H2-D1	-1.16667	1.16667	increase
Hif3a	0.5	-0.5	increase
Hmgcs2	0	0	increase
Hsd11b1	0	1	increase
Ifitm2	0	0	increase
Igfbp3	0	1	increase
Il4	0	0	increase
Klf15	0	0	increase
Klk1b22	0.65	-0.65	increase
Matn1	0	0	increase
Ms4a6b	0	0	increase
Myl4	0	1	increase
Ovgp1	-0.45	0.45	increase
Plin4	0	1	increase
Pnpla2	0	0	increase
Rad18	0	0	increase
Rbm3	0	0	increase
Sat2	0.583333	-0.583333	increase
Sbsn	0	0	increase
Scrg1	-0.45	0.45	increase
Stfa1	0	0	increase
Stfa2l1	0	0	increase
Sult1a1	0	1	increase
Tdo2	0	0	increase
Trp53inp1	0	1	increase
Txnip	-0.4	1.4	increase
Ugt1a6a	0	1	increase
Wfikkn2	0.583333	-0.583333	increase
Xpa	0	1	increase
Abi3bp	0	-1	decrease
Acvr1c	0	-1	decrease
Apln	0	-1	decrease
Bcs1l	-0.5	0.5	decrease
C130026L21Rik	0	0	decrease
Ceacam1	0	0	decrease
Chrna5	0	0	decrease
Cml5	0	0	decrease
Cmtm5	0	0	decrease
Crh	0	1	decrease
Cyp27a1	0	0	decrease
Dlx1as	0	0	decrease
Emcn	-0.75	0	decrease
Ephx2	-0.45	0.45	decrease
Ermn	0	0	decrease
Evi2a	0	0	decrease
Fabp7	-0.5	0	decrease
Fcrls	0	-1	decrease
G6pd2	-0.5	0.5	decrease
Gpr34	0	0	decrease
Hapln4	0	-1	decrease
Hsph1	0	0	decrease
Ighm	0	0	decrease
Itgam	0	0	decrease
Kctd21	0	-1	decrease
Klk6	0	0	decrease
Lcat	0	-1	decrease
Lrrk2	-0.666667	0.666667	decrease
Masp2	0.45	-0.45	decrease
Mkks	-0.833333	0.833333	decrease
Mrrf	0	0	decrease
Ninj2	0	0	decrease
Olfml3	0	-1	decrease
Opn3	0	-1	decrease
P2ry12	0	0	decrease
Phkg1	0	0	decrease
Pltp	0	-1	decrease
Plxnb3	-0.583333	0	decrease
Pth2r	0	0	decrease
Pycr1	0	0	decrease
Rdh5	0	0	decrease
Rlbp1	-0.45	0.45	decrease
Rnpep	0	0	decrease
Selplg	0	-1	decrease
Sirt6	0	0	decrease
Slc16a4	-0.5	0.5	decrease
Slc16a6	0	0	decrease
Slc16a7	0	0	decrease
Slc22a8	-0.583333	0.583333	decrease
Slc47a1	0	0	decrease
Ttpa	0	0	decrease
