# Supplementary material for: Aging and pathological aging signatures of the brain: through the focusing lens of SIRT6
Source: Aging (Albany NY). 2021 Mar 9;13(5):6420–41. doi: 10.18632/aging.202755 (PMC7993737; doi:10.18632/aging.202755)
Supplement: Supplementary Table 6 [file aging-13-202755-s007.xlsx]

## Sheet: 20.12.29 - P8-S5 - categorized 
Supplementary Table 6. Genes in each brain signature category, together with their confidence scores.
Non-Pathological Gene name	Non-Pathological Confidence Score	Pathological Gene name	Pathological Confidence Score	Reversible Gene name	Reversible Confidence Score	Irreversible Gene name	Irreversible Confidence Score
2700046A07Rik	0.444444	1500012F01Rik	0.462963	1500012F01Rik	0.462963	2700046A07Rik	0.444444
Abi3bp	0.555556	2810410L24Rik	0.277778	2810410L24Rik	0.277778	Acr	0.888889
Acr	0.888889	Amy1	0.5	Abi3bp	0.555556	Aloxe3	0.777778
Acvr1c	0.555556	Bcs1l	0.444444	Acvr1c	0.555556	Ap1g2	0.666667
Aloxe3	0.777778	Cirbp	0.5	Amy1	0.5	Apoc1	0.777778
Ap1g2	0.666667	Emcn	0.666667	Apln	0.888889	Arhgap11a	0.666667
Apln	0.888889	Ephx2	0.45	Arrdc1	0.666667	Arrdc4	0.666667
Apoc1	0.777778	Fabp7	0.5	Bcs1l	0.444444	C130026L21Rik	0.444444
Arhgap11a	0.666667	G6pd2	0.444444	Ccl17	1	C4b	0.222222
Arrdc1	0.666667	Gemin4	0.444444	Cdkn1a	1	Ceacam1	0.666667
Arrdc4	0.666667	H2-D1	0.648148	Cirbp	0.5	Chrna5	0.777778
C130026L21Rik	0.444444	Hif3a	0.444444	Crh	0.777778	Clcnka	0.888889
C4b	0.222222	Klk1b22	0.65	Ephx2	0.45	Cml5	0.444444
Ccl17	1	Lrrk2	0.518519	Fcrls	0.555556	Cmtm5	0.666667
Cdkn1a	1	Masp2	0.45	Fkbp5	0.888889	Cps1	0.888889
Ceacam1	0.666667	Mkks	0.648148	G6pd2	0.444444	Cyp27a1	0.666667
Chrna5	0.777778	Ovgp1	0.45	Gemin4	0.444444	Dbh	0.777778
Clcnka	0.888889	Plxnb3	0.453704	Glcci1	0.666667	Dlx1as	0.555556
Cml5	0.444444	Rlbp1	0.45	H2-D1	0.648148	Dpt	0.888889
Cmtm5	0.666667	Sat2	0.453704	Hapln4	0.666667	Emcn	0.666667
Cps1	0.888889	Scrg1	0.45	Hif3a	0.444444	Ermn	0.666667
Crh	0.777778	Slc16a4	0.444444	Hsd11b1	1	Evi2a	0.888889
Cyp27a1	0.666667	Slc22a8	0.453704	Igfbp3	1	Fabp7	0.5
Dbh	0.777778	Txnip	0.4	Kctd21	0.777778	Gpr34	0.666667
Dlx1as	0.555556	Wfikkn2	0.453704	Klk1b22	0.65	Hmgcs2	0.888889
Dpt	0.888889			Lcat	0.888889	Hsph1	0.666667
Ermn	0.666667			Lrrk2	0.518519	Ifitm2	0.888889
Evi2a	0.888889			Masp2	0.45	Ighm	0.333333
Fcrls	0.555556			Mkks	0.648148	Il4	0.888889
Fkbp5	0.888889			Myl4	0.777778	Itgam	0.777778
Glcci1	0.666667			Olfml3	0.777778	Klf15	0.666667
Gpr34	0.666667			Opn3	0.777778	Klk6	0.666667
Hapln4	0.666667			Ovgp1	0.45	Matn1	0.888889
Hmgcs2	0.888889			Plin4	0.777778	Mrrf	0.666667
Hsd11b1	1			Pltp	0.888889	Ms4a6b	0.777778
Hsph1	0.666667			Rlbp1	0.45	Ninj2	0.666667
Ifitm2	0.888889			Sat2	0.453704	P2ry12	0.666667
Igfbp3	1			Scrg1	0.45	Phkg1	0.888889
Ighm	0.333333			Selplg	0.666667	Plxnb3	0.453704
Il4	0.888889			Slc16a4	0.444444	Pnpla2	0.888889
Itgam	0.777778			Slc22a8	0.453704	Pth2r	0.777778
Kctd21	0.777778			Sult1a1	0.666667	Pycr1	0.777778
Klf15	0.666667			Trp53inp1	0.666667	Rad18	0.666667
Klk6	0.666667			Txnip	0.4	Rbm3	0.888889
Lcat	0.888889			Ugt1a6a	0.888889	Rdh5	0.777778
Matn1	0.888889			Wfikkn2	0.453704	Rnpep	0.888889
Mrrf	0.666667			Xpa	0.666667	Sbsn	0.666667
Ms4a6b	0.777778					Sirt6	0.666667
Myl4	0.777778					Slc16a6	0.777778
Ninj2	0.666667					Slc16a7	0.888889
Olfml3	0.777778					Slc47a1	0.666667
Opn3	0.777778					Stfa1	0.777778
P2ry12	0.666667					Stfa2l1	0.777778
Phkg1	0.888889					Tdo2	0.888889
Plin4	0.777778					Ttpa	0.666667
Pltp	0.888889
Pnpla2	0.888889
Pth2r	0.777778
Pycr1	0.777778
Rad18	0.666667
Rbm3	0.888889
Rdh5	0.777778
Rnpep	0.888889
Sbsn	0.666667
Selplg	0.666667
Sirt6	0.666667
Slc16a6	0.777778
Slc16a7	0.888889
Slc47a1	0.666667
Stfa1	0.777778
Stfa2l1	0.777778
Sult1a1	0.666667
Tdo2	0.888889
Trp53inp1	0.666667
Ttpa	0.666667
Ugt1a6a	0.888889
Xpa	0.666667
