# Supplementary material for: Aging and pathological aging signatures of the brain: through the focusing lens of SIRT6
Source: Aging (Albany NY). 2021 Mar 9;13(5):6420–41. doi: 10.18632/aging.202755 (PMC7993737; doi:10.18632/aging.202755)
Supplement: Supplementary Table 7 [file aging-13-202755-s008.xlsx]

## Sheet: Non Pathological
Supplementary Table 7. Candidate TFs for each brain signature category. Tables of the TFs for each signature category together with their Human, Mouse and Combined Scores.
Non Pathological
TF	HitScore_Human	HitScore_Mouse	norm_Z_score_Human	norm_Z_score_Mouse	TF_ProminenceScore_Z_Human	TF_ProminenceScore_Z_Mouse	CombinedProminenceScore_Z
ZNF354C	0.925373	0.896104	17.859	15.437	16.5262	13.8332	228.61
RUNX1	0.686567	0.753247	16.01	19.266	10.9919	14.5121	159.516
MZF1_1-4	0.850746	0.909091	11.217	17.458	9.54282	15.8709	151.453
ELF5	0.835821	0.844156	15.497	12.314	12.9527	10.3949	134.643
FEV	0.761194	0.727273	15.327	14.539	11.6668	10.5738	123.363
AP1	0.820896	0.909091	12.85	12.27	10.5485	11.1545	117.664
ZEB1	0.776119	0.883117	12.701	12.853	9.85749	11.3507	111.889
SPIB	0.850746	0.844156	12.802	10.559	10.8913	8.91344	97.0786
Myf	0.61194	0.61039	16.293	15.695	9.97034	9.58006	95.5165
Tcfcp2l1	0.597015	0.584416	16.402	16.065	9.79224	9.38864	91.9358
YY1	0.80597	0.831169	14.224	9.433	11.4641	7.84042	89.8835
NR4A2	0.746269	0.74026	10.041	14.961	7.49328	11.075	82.9883
Klf4	0.731343	0.701299	7.86	20.361	5.74836	14.2791	82.0816
Gfi	0.641791	0.714286	13.911	12.655	8.92796	9.03929	80.7023
CEBPA	0.58209	0.701299	12.563	15.486	7.31279	10.8603	79.4192
Hand1::Tcfe2a	0.641791	0.779221	10.605	14.952	6.80619	11.6509	79.2983
SPI1	0.731343	0.792208	9.46	14.25	6.91851	11.289	78.1028
EBF1	0.567164	0.61039	13.213	13.755	7.49394	8.39591	62.9184
SRY	0.641791	0.74026	13.325	9.505	8.55187	7.03617	60.1724
Myb	0.686567	0.675325	10.179	11.865	6.98857	8.01273	55.9975
USF1	0.522388	0.61039	9.72	17.131	5.07761	10.4566	53.0945
NFATC2	0.716418	0.753247	14.891	6.458	10.6682	4.86447	51.895
Stat3	0.492537	0.532468	12.549	14.476	6.18085	7.708	47.642
FOXO3	0.58209	0.636364	13.621	9.336	7.92864	5.94109	47.1048
Sox17	0.641791	0.714286	13.763	7.189	8.83297	5.135	45.3573
SP1	0.641791	0.714286	7.905	11.852	5.07336	8.46571	42.9496
FOXA1	0.61194	0.727273	9.522	9.989	5.8269	7.26473	42.3308
Arnt::Ahr	0.656716	0.792208	8.063	9.754	5.2951	7.72719	40.9163
Sox5	0.597015	0.662338	12.718	7.961	7.59284	5.27287	40.036
Nkx3-2	0.701493	0.779221	7.292	9.036	5.11528	7.04104	36.0169
TAL1::TCF3	0.402985	0.441558	13.581	14.65	5.47294	6.46883	35.4035
MZF1_5-13	0.641791	0.714286	6.227	11.992	3.99643	8.56571	34.2323
HOXA5	0.761194	0.818182	11.895	4.313	9.0544	3.52882	31.9513
TBP	0.477612	0.584416	11.211	9.898	5.35451	5.78455	30.9734
MAX	0.402985	0.467532	10.676	15.297	4.30227	7.15184	30.7692
Gata1	0.597015	0.74026	9.071	7.144	5.41552	5.28842	28.6395
Foxa2	0.507463	0.649351	8.134	10.239	4.1277	6.6487	27.4439
FOXD1	0.552239	0.662338	9.358	7.969	5.16785	5.27817	27.2768
ARID3A	0.686567	0.805195	11.626	3.893	7.98203	3.13462	25.0207
NKX3-1	0.537313	0.636364	10.148	6.861	5.45266	4.36609	23.8068
ELK1	0.61194	0.688312	3.586	15.745	2.19442	10.8375	23.7819
CREB1	0.358209	0.545455	8.625	13.823	3.08955	7.53982	23.2947
REL	0.447761	0.545455	8.197	10.795	3.6703	5.88818	21.6114
SOX9	0.507463	0.61039	6.149	11.34	3.12039	6.92182	21.5988
NFE2L2	0.358209	0.337662	12.414	13.716	4.44681	4.63138	20.5948
E2F1	0.432836	0.363636	8.136	15.922	3.52155	5.78982	20.3891
Esrrb	0.537313	0.519481	9.112	7.75	4.896	4.02597	19.7112
INSM1	0.328358	0.415584	10.043	13.939	3.2977	5.79283	19.103
Zfp423	0.283582	0.350649	12.404	15.319	3.51755	5.3716	18.8949
NF-kappaB	0.447761	0.415584	8.639	11.421	3.86821	4.74639	18.36
HIF1A::ARNT	0.492537	0.558442	7.936	8.282	3.90878	4.62501	18.0781
Foxd3	0.432836	0.61039	8.965	6.714	3.88037	4.09816	15.9024
HNF4A	0.298507	0.415584	6.119	20.173	1.82657	8.38358	15.3132
Zfx	0.41791	0.363636	8.057	12.346	3.3671	4.48945	15.1165
IRF1	0.298507	0.298701	13.755	11.851	4.10597	3.53991	14.5348
RELA	0.38806	0.376623	9.449	10.068	3.66678	3.79184	13.9038
Prrx2	0.61194	0.74026	7.199	3.929	4.40536	2.90848	12.8129
NFYA	0.343284	0.324675	9.157	12.44	3.14345	4.03896	12.6963
TEAD1	0.313433	0.272727	13.221	10.677	4.1439	2.91191	12.0666
Nkx2-5	0.731343	0.857143	10.79	1.741	7.89119	1.49229	11.7759
Pdx1	0.671642	0.701299	6.861	3.535	4.60813	2.47909	11.424
NHLH1	0.343284	0.298701	10.624	10.442	3.64704	3.11904	11.3753
PPARG::RXRA	0.238806	0.441558	5.017	21.427	1.19809	9.46127	11.3355
NR2F1	0.253731	0.233766	10.402	16.507	2.63931	3.85878	10.1845
Nobox	0.597015	0.649351	7.184	3.638	4.28896	2.36234	10.132
Foxq1	0.328358	0.38961	8.946	7.803	2.93749	3.04013	8.93036
Ddit3::Cebpa	0.343284	0.233766	12.13	9.115	4.16403	2.13078	8.87263
FOXF2	0.238806	0.233766	9.78	15.989	2.33552	3.73769	8.72945
GABPA	0.432836	0.428571	5.975	7.817	2.58619	3.35014	8.66412
Mycn	0.38806	0.454545	4.451	10.767	1.72725	4.89409	8.45334
Nr2e3	0.283582	0.324675	8.127	10.187	2.30467	3.30747	7.62263
MEF2A	0.313433	0.350649	6.569	10.288	2.05894	3.60748	7.42759
ELK4	0.268657	0.298701	10.106	9.053	2.71504	2.70414	7.34187
Lhx3	0.283582	0.233766	13.172	8.405	3.73534	1.96481	7.33922
HLF	0.268657	0.298701	8.567	9.489	2.30158	2.83438	6.52355
RORA_1	0.402985	0.493506	2.848	11.017	1.1477	5.43696	6.24001
STAT1	0.343284	0.272727	13.108	4.606	4.49976	1.25618	5.65252
Myc	0.343284	0.467532	2.927	10.647	1.00479	4.97782	5.00167
Arnt	0.253731	0.38961	3.946	12.439	1.00122	4.84636	4.8523
RORA_2	0.223881	0.220779	7.574	11.64	1.69567	2.56987	4.35766
NFIL3	0.283582	0.272727	7.647	7.037	2.16855	1.91918	4.16185
Pou5f1	0.149254	0.181818	12.939	11.032	1.93119	2.00582	3.87362
Spz1	0.343284	0.376623	3.101	8.403	1.06452	3.16477	3.36896
Egr1	0.268657	0.311688	4.688	8.513	1.25946	2.6534	3.34186
ESR2	0.164179	0.12987	15.748	8.65	2.58549	1.12338	2.90448
MYC::MAX	0.164179	0.181818	8.196	11	1.34561	2	2.69122
CTCF	0.149254	0.142857	9.368	11.782	1.39821	1.68314	2.35339
PBX1	0.149254	0.194805	10.686	7.538	1.59493	1.46844	2.34205
Ar	0.0746269	0.0519481	26.187	22.148	1.95425	1.15055	2.24846
IRF2	0.0746269	0.0909091	15.237	19.374	1.13709	1.76127	2.00272
NR3C1	0.134328	0.0909091	14.354	10.939	1.92815	0.994455	1.91746
Sox2	0.179104	0.116883	11.904	5.851	2.13206	0.683883	1.45808
Tal1::Gata1	0.283582	0.25974	4.516	3.928	1.28066	1.02026	1.3066
RXR::RAR_DR5	0.119403	0.0779221	13.775	10.172	1.64478	0.792623	1.30369
HNF1A	0.149254	0.12987	6.855	9.475	1.02313	1.23052	1.25899
Evi1	0.104478	0.103896	7.912	9.695	0.826627	1.00727	0.832639
PLAG1	0.104478	0.0909091	6.547	11.549	0.684015	1.04991	0.718153
Pax5	0.104478	0.0519481	13.389	9.487	1.39885	0.492831	0.689397
NFKB1	0.164179	0.168831	1.594	13.552	0.261701	2.288	0.598773
SRF	0.0597015	0.0649351	9.059	16.024	0.540836	1.04052	0.56275
RREB1	0.0746269	0.0779221	6.089	15.28	0.454403	1.19065	0.541035
MIZF	0.0597015	0.0909091	3.195	10.713	0.190746	0.973909	0.18577
T	0.0447761	0.0909091	4.135	9.389	0.185149	0.853545	0.158033
Pax6	0.0447761	0.0519481	5.144	8.221	0.230328	0.427065	0.0983652
TLX1::NFIC	0.0447761	0.025974	8.206	7.744	0.367433	0.201143	0.0739065
REST	0.0149254	0.025974	8.736	15.376	0.130388	0.399377	0.0520739
ESR1	0.0149254	0.025974	7.007	12.556	0.104582	0.32613	0.0341073
HNF1B	0.104478	0.116883	0.317	6.602	0.0331194	0.771662	0.025557
RXRA::VDR	0.0149254	0.025974	5.937	10.074	0.0886119	0.261662	0.0231864
EWSR1-FLI1	0	0.012987	4.027	10.926	0	0.141896	0
FOXI1	0.507463	0.61039	6.877	0	3.48982	0	0
NR1H2::RXRA	0	0.012987	5.085	13.396	0	0.173974	0
PPARG	0	0	5.358	7.447	0	0	0
Pax4	0	0	4.194	6.789	0	0	0
TP53	0	0.012987	6.202	29.856	0	0.38774	0
znf143	0.0149254	0.0779221	0	12.101	0	0.942935	0

## Sheet: Pathological
Pathological
TF	HitScore_Human	HitScore_Mouse	norm_Z_score_Human	norm_Z_score_Mouse	TF_ProminenceScore_Z_Human	TF_ProminenceScore_Z_Mouse	CombinedProminenceScore_Z
Klf4	0.736842	0.64	19.944	12.599	14.6956	8.06336	118.496
ZNF354C	0.894737	0.88	13.278	6.489	11.8803	5.71032	67.8404
MZF1_5-13	0.631579	0.68	15.643	9.677	9.87979	6.58036	65.0126
Zfx	0.473684	0.44	18.369	16.833	8.70111	7.40652	64.4449
SP1	0.631579	0.64	14.505	10.591	9.16105	6.77824	62.0958
Tcfcp2l1	0.473684	0.6	15.962	13.328	7.56095	7.9968	60.4634
PPARG::RXRA	0.421053	0.4	26.899	10.913	11.3259	4.3652	49.4398
Myf	0.473684	0.52	14.986	12.301	7.09863	6.39652	45.4065
HNF4A	0.368421	0.44	17.258	14.803	6.35821	6.51332	41.4131
ELF5	0.842105	0.72	6.335	9.863	5.33474	7.10136	37.8839
NR4A2	0.526316	0.68	11.649	8.206	6.13105	5.58008	34.2118
MZF1_1-4	0.842105	0.76	7.741	6.797	6.51874	5.16572	33.674
RUNX1	0.631579	0.8	5.943	11.198	3.75347	8.9584	33.6251
Nkx3-2	0.842105	0.84	5.157	9.072	4.34274	7.62048	33.0937
EBF1	0.526316	0.56	8.906	10.488	4.68737	5.87328	27.5302
YY1	0.736842	0.84	7.52	5.624	5.54105	4.72416	26.1768
Arnt::Ahr	0.631579	0.64	11.798	5.228	7.45137	3.34592	24.9317
SOX9	0.578947	0.72	6.793	7.161	3.93279	5.15592	20.2771
FEV	0.631579	0.72	4.363	9.907	2.75558	7.13304	19.6557
NFATC2	0.631579	0.76	4.622	7.864	2.91916	5.97664	17.4468
ZEB1	0.789474	0.84	5.632	4.552	4.44632	3.82368	17.0013
HOXA5	0.736842	0.84	3.536	7.346	2.60547	6.17064	16.0774
Hand1::Tcfe2a	0.526316	0.6	7.088	6.876	3.73053	4.1256	15.3907
Zfp423	0.315789	0.28	11.843	13.774	3.73989	3.85672	14.4237
INSM1	0.263158	0.4	10.559	12.376	2.77868	4.9504	13.7556
FOXA1	0.684211	0.64	7.362	3.999	5.03716	2.55936	12.8919
Pdx1	0.578947	0.68	5.347	5.718	3.09563	3.88824	12.0366
SPI1	0.578947	0.68	4.933	5.95	2.85595	4.046	11.5552
USF1	0.368421	0.32	10.145	9.631	3.73763	3.08192	11.5191
SPIB	0.736842	0.8	2.952	6.605	2.17516	5.284	11.4935
SRY	0.578947	0.72	3.757	7.073	2.17511	5.09256	11.0769
AP1	0.684211	0.72	5.4	3.888	3.69474	2.79936	10.3429
Mycn	0.315789	0.28	15.286	6.937	4.82716	1.94236	9.37608
Prrx2	0.473684	0.6	5.354	6.044	2.53611	3.6264	9.19693
TBP	0.368421	0.52	8.226	5.747	3.03063	2.98844	9.05686
HIF1A::ARNT	0.263158	0.44	9.36	8.037	2.46316	3.53628	8.71042
Foxa2	0.578947	0.52	4.975	5.77	2.88026	3.0004	8.64194
REL	0.473684	0.44	6.506	5.596	3.08179	2.46224	7.58811
TAL1::TCF3	0.263158	0.36	8.391	9.472	2.20816	3.40992	7.52964
STAT1	0.210526	0.32	7.535	14.512	1.58632	4.64384	7.3666
Spz1	0.315789	0.24	12.54	7.511	3.96	1.80264	7.13845
FOXI1	0.473684	0.52	4.808	5.932	2.27747	3.08464	7.02519
Myc	0.263158	0.28	9.997	8.786	2.63079	2.46008	6.47195
Myb	0.578947	0.68	8.09	2.027	4.68368	1.37836	6.4558
ARID3A	0.736842	0.72	2.414	5.035	1.77874	3.6252	6.44828
Stat3	0.263158	0.4	5.679	10.421	1.49447	4.1684	6.22956
RELA	0.263158	0.28	7.677	9.914	2.02026	2.77592	5.60809
TEAD1	0.210526	0.24	11.305	9.545	2.38	2.2908	5.4521
Sox17	0.631579	0.6	6.3	2.245	3.97895	1.347	5.35964
Foxd3	0.473684	0.36	4.008	7.247	1.89853	2.60892	4.9531
IRF1	0.210526	0.32	7.352	9.519	1.54779	3.04608	4.71469
PBX1	0.105263	0.36	7.094	17.538	0.746737	6.31368	4.71466
Nobox	0.473684	0.64	3.236	4.664	1.53284	2.98496	4.57547
Gata1	0.631579	0.68	2.5	3.718	1.57895	2.52824	3.99196
CEBPA	0.421053	0.6	2.679	5.829	1.128	3.4974	3.94507
Sox5	0.473684	0.68	2.113	5.768	1.00089	3.92224	3.92575
Arnt	0.157895	0.28	9.85	8.851	1.55526	2.47828	3.85438
NFE2L2	0.210526	0.24	9.072	8.308	1.90989	1.99392	3.80818
RORA_1	0.210526	0.36	5.366	8.636	1.12968	3.10896	3.51214
Egr1	0.210526	0.16	12.805	7.261	2.69579	1.16176	3.13186
NR2F1	0.157895	0.16	13.412	8.277	2.11768	1.32432	2.80449
PLAG1	0.105263	0.12	15.83	13.445	1.66632	1.6134	2.68843
CREB1	0.315789	0.24	6.429	5.345	2.03021	1.2828	2.60435
NHLH1	0.210526	0.16	8.419	8.873	1.77242	1.41968	2.51627
MAX	0.210526	0.24	7.816	5.533	1.64547	1.32792	2.18506
Ar	0.105263	0.04	25.566	19.431	2.69116	0.77724	2.09168
FOXF2	0.105263	0.16	9.329	13.272	0.982	2.12352	2.0853
ELK1	0.421053	0.64	1.876	4.122	0.789895	2.63808	2.08381
MEF2A	0.210526	0.24	5.52	6.519	1.16211	1.56456	1.81818
FOXD1	0.368421	0.6	1.115	7.278	0.410789	4.3668	1.79384
MYC::MAX	0.105263	0.16	8.945	10.899	0.941579	1.74384	1.64196
NFKB1	0.105263	0.16	7.358	11.98	0.774526	1.9168	1.48461
NR3C1	0.210526	0.04	21.997	7.582	4.63095	0.30328	1.40447
NFYA	0.105263	0.2	6.705	9.871	0.705789	1.9742	1.39337
NKX3-1	0.578947	0.52	3.611	1.279	2.09058	0.66508	1.3904
SRF	0.0526316	0.12	11.671	17.442	0.614263	2.09304	1.28568
Nr2e3	0.157895	0.24	6.219	5.318	0.981947	1.27632	1.25328
T	0.105263	0.08	16.023	8.968	1.68663	0.71744	1.21006
NF-kappaB	0.210526	0.28	4.272	4.717	0.899368	1.32076	1.18785
ELK4	0.0526316	0.36	4.343	13.549	0.228579	4.87764	1.11493
Esrrb	0.263158	0.4	3.323	3.152	0.874474	1.2608	1.10254
FOXO3	0.421053	0.6	1.575	2.645	0.663158	1.587	1.05243
E2F1	0.157895	0.24	4.144	6.535	0.654316	1.5684	1.02623
Tal1::Gata1	0.105263	0.24	3.394	8.159	0.357263	1.95816	0.699578
Ddit3::Cebpa	0.0526316	0.28	5.138	8.539	0.270421	2.39092	0.646555
CTCF	0.105263	0.08	9.785	6.45	1.03	0.516	0.53148
RXR::RAR_DR5	0.105263	0.04	15.718	7.528	1.65453	0.30112	0.498211
Lhx3	0.105263	0.2	3.481	6.375	0.366421	1.275	0.467187
Nkx2-5	0.736842	0.8	0.835	0.725	0.615263	0.58	0.356853
Foxq1	0.157895	0.28	1.84	3.927	0.290526	1.09956	0.319451
NFIL3	0.105263	0.2	2.738	5.196	0.288211	1.0392	0.299508
HNF1A	0.0526316	0.08	6.462	8.982	0.340105	0.71856	0.244386
TLX1::NFIC	0.0526316	0.04	11.405	8.791	0.600263	0.35164	0.211077
RORA_2	0.0526316	0.08	5.852	5.088	0.308	0.40704	0.125368
HLF	0.0526316	0.12	3.36	4.87	0.176842	0.5844	0.103347
HNF1B	0.105263	0.04	6.892	2.505	0.725474	0.1002	0.0726925
ESR1	0	0.04	6.955	14.516	0	0.58064	0
ESR2	0	0.12	4.309	13.483	0	1.61796	0
EWSR1-FLI1	0	0	7.328	6.238	0	0	0
Evi1	0.0526316	0	8.612	3.361	0.453263	0	0
GABPA	0.0526316	0.36	0	9.095	0	3.2742	0
Gfi	0.473684	0.68	4.972	0	2.35516	0	0
IRF2	0	0.08	6.121	15.693	0	1.25544	0
MIZF	0	0	5.547	3.829	0	0	0
NR1H2::RXRA	0.0526316	0	27.303	6.584	1.437	0	0
PPARG	0	0	7.583	6.671	0	0	0
Pax4	0	0	7.372	6.469	0	0	0
Pax5	0	0.04	5.404	7.994	0	0.31976	0
Pax6	0	0.04	5.926	8.13	0	0.3252	0
Pou5f1	0	0.2	3.072	12.319	0	2.4638	0
REST	0	0	7.174	6.038	0	0	0
RREB1	0	0.08	4.867	10.654	0	0.85232	0
RXRA::VDR	0	0.04	6.953	11.888	0	0.47552	0
Sox2	0	0.08	3.881	6.905	0	0.5524	0
TP53	0	0	6.842	6.577	0	0	0
znf143	0	0	5.274	3.321	0	0	0

## Sheet: Reversible
Reversible
TF	HitScore_Human	HitScore_Mouse	norm_Z_score_Human	norm_Z_score_Mouse	TF_ProminenceScore_Z_Human	TF_ProminenceScore_Z_Mouse	CombinedProminenceScore_Z
ZNF354C	0.894737	0.93617	14.291	13.596	12.7867	12.7282	162.751
Klf4	0.789474	0.723404	13.429	16.769	10.6018	12.1308	128.608
RUNX1	0.631579	0.787234	13.505	16.777	8.52947	13.2074	112.652
FOXA1	0.684211	0.744681	14.661	13.041	10.0312	9.71138	97.4169
YY1	0.763158	0.851064	13.014	10.085	9.93174	8.58298	85.2439
NR4A2	0.710526	0.765957	11.284	12.382	8.01758	9.48409	76.0394
Tcfcp2l1	0.605263	0.638298	12.535	15.244	7.58697	9.73021	73.8229
Hand1::Tcfe2a	0.631579	0.680851	14.297	11.805	9.02968	8.03745	72.5756
MZF1_1-4	0.868421	0.851064	9.674	9.849	8.40111	8.38213	70.4191
Myf	0.605263	0.574468	15.593	12.93	9.43787	7.42787	70.1033
ZEB1	0.789474	0.93617	9.229	9.726	7.28605	9.10519	66.3409
ELF5	0.842105	0.787234	10.531	9.488	8.86821	7.46928	66.2391
TBP	0.578947	0.595745	12.729	12.296	7.36942	7.32528	53.983
MZF1_5-13	0.710526	0.723404	11.672	8.814	8.29326	6.37609	52.8786
AP1	0.815789	0.87234	9.657	7.318	7.87808	6.38379	50.292
HOXA5	0.710526	0.787234	10.086	8.568	7.16637	6.74502	48.3373
FEV	0.736842	0.723404	8.691	10.346	6.40389	7.48434	47.9289
NFATC2	0.684211	0.808511	11.223	7.428	7.67889	6.00562	46.1165
SRY	0.578947	0.723404	11.17	9.779	6.46684	7.07417	45.7475
Foxa2	0.578947	0.680851	10.023	11.2	5.80279	7.62553	44.2494
Arnt::Ahr	0.710526	0.787234	10.015	7.81	7.11592	6.1483	43.7508
FOXO3	0.552632	0.617021	15.124	8.146	8.358	5.02626	42.0094
SP1	0.684211	0.702128	9.514	8.616	6.50958	6.04953	39.3799
USF1	0.552632	0.553191	8.996	13.726	4.97147	7.59311	37.7489
PPARG::RXRA	0.342105	0.489362	12.473	18.067	4.26708	8.8413	37.7265
Stat3	0.473684	0.489362	9.341	15.041	4.42468	7.36049	32.5678
TAL1::TCF3	0.368421	0.531915	10.473	15.429	3.85847	8.20691	31.6662
SOX9	0.526316	0.680851	6.385	13.728	3.36053	9.34672	31.4099
Foxd3	0.473684	0.489362	11.984	10.405	5.67663	5.09181	28.9043
Sox17	0.578947	0.659574	10.463	6.288	6.05753	4.1474	25.123
HNF4A	0.342105	0.468085	7.749	20.134	2.65097	9.42443	24.9839
CEBPA	0.447368	0.638298	8.195	10.628	3.66618	6.78383	24.8708
FOXD1	0.473684	0.659574	7.918	9.895	3.75063	6.52649	24.4785
SPI1	0.736842	0.744681	6.361	6.925	4.68705	5.15691	24.1707
Myb	0.657895	0.702128	7.222	7.037	4.75132	4.94087	23.4756
NKX3-1	0.631579	0.574468	8.78	7.15	5.54526	4.10745	22.7769
INSM1	0.421053	0.404255	10.703	12.373	4.50653	5.00185	22.541
ARID3A	0.710526	0.765957	7.857	5.223	5.58261	4.0006	22.3337
Zfx	0.447368	0.382979	8.074	16.134	3.61205	6.17898	22.3188
FOXI1	0.473684	0.638298	8.319	8.748	3.94058	5.58383	22.0035
EBF1	0.605263	0.638298	9.362	5.778	5.66647	3.68809	20.8984
SPIB	0.815789	0.829787	4.142	6.508	3.379	5.40026	18.2475
Zfp423	0.368421	0.382979	9.56	13.145	3.52211	5.03426	17.7312
Sox5	0.473684	0.595745	9.808	6.141	4.64589	3.65847	16.9969
Gfi	0.473684	0.744681	7.667	5.858	3.63174	4.36234	15.8429
REL	0.5	0.510638	7.045	8.521	3.5225	4.35115	15.3269
Gata1	0.605263	0.723404	5.205	6.267	3.15039	4.53357	14.2825
Mycn	0.447368	0.425532	7.998	9.174	3.57805	3.90383	13.9681
NHLH1	0.394737	0.276596	10.58	11.287	4.17632	3.12194	13.0382
Nkx3-2	0.763158	0.87234	2.164	8.802	1.65147	7.67834	12.6806
Myc	0.394737	0.446809	6.76	10.383	2.66842	4.63921	12.3794
MAX	0.368421	0.361702	10.014	8.985	3.68937	3.24989	11.9901
Ar	0.157895	0.0638298	40.969	28.896	6.46879	1.84443	11.9312
NR2F1	0.289474	0.255319	12.617	12.735	3.65229	3.25149	11.8754
RELA	0.394737	0.319149	10.105	9.303	3.98882	2.96904	11.843
IRF1	0.315789	0.297872	12.799	9.48	4.04179	2.82383	11.4133
STAT1	0.342105	0.319149	9.96	10.474	3.40737	3.34277	11.39
NFE2L2	0.368421	0.340426	10.221	8.773	3.76563	2.98655	11.2463
Foxq1	0.315789	0.382979	9.889	9.233	3.12284	3.53604	11.0425
TEAD1	0.342105	0.276596	13.994	7.552	4.78742	2.08885	10.0002
CREB1	0.421053	0.361702	6.761	9.511	2.84674	3.44015	9.7932
MEF2A	0.342105	0.382979	6.051	12.347	2.07008	4.72864	9.78865
HIF1A::ARNT	0.421053	0.553191	5.852	6.918	2.464	3.82698	9.42968
PBX1	0.210526	0.319149	9.862	13.98	2.07621	4.4617	9.26343
Pdx1	0.578947	0.702128	6.098	3.717	3.53042	2.60981	9.21372
Esrrb	0.5	0.489362	3.924	8.222	1.962	4.02353	7.89417
FOXF2	0.236842	0.191489	11.572	13.895	2.74074	2.66074	7.2924
Lhx3	0.236842	0.255319	11.093	10.804	2.62729	2.75847	7.24729
RORA_1	0.394737	0.446809	3.59	10.614	1.41711	4.74243	6.72052
NR3C1	0.236842	0.0851064	24.586	13.223	5.823	1.12536	6.55298
Ddit3::Cebpa	0.263158	0.234043	11.621	8.359	3.05816	1.95636	5.98286
ELK4	0.236842	0.382979	4.914	13.422	1.16384	5.14034	5.98254
Spz1	0.368421	0.382979	3.952	10.634	1.456	4.0726	5.9297
NF-kappaB	0.368421	0.382979	4.171	9.444	1.53668	3.61685	5.55796
Prrx2	0.526316	0.680851	5.135	2.727	2.70263	1.85668	5.01792
SRF	0.131579	0.12766	15.653	18.276	2.05961	2.33311	4.80528
E2F1	0.315789	0.361702	2.928	14.044	0.924632	5.07974	4.69689
Nobox	0.5	0.617021	4.734	3.115	2.367	1.92202	4.54942
NFIL3	0.236842	0.276596	7.692	8.43	1.82179	2.3317	4.24787
ESR2	0.131579	0.170213	13.944	13.455	1.83474	2.29021	4.20194
CTCF	0.184211	0.191489	9.124	12.512	1.68074	2.39591	4.0269
RXR::RAR_DR5	0.131579	0.12766	13.405	14.845	1.76382	1.89511	3.34262
HLF	0.236842	0.255319	7.083	7.507	1.67755	1.91668	3.21533
Egr1	0.236842	0.319149	4.333	9.773	1.02624	3.11904	3.20088
NFYA	0.263158	0.255319	5.915	6.93	1.55658	1.76936	2.75415
Arnt	0.184211	0.340426	4.248	9.547	0.782526	3.25004	2.54324
MYC::MAX	0.184211	0.170213	7.444	10.885	1.37126	1.85277	2.54063
NFKB1	0.184211	0.212766	3.246	16.879	0.597947	3.59128	2.14739
Pou5f1	0.105263	0.191489	8.563	11.361	0.901368	2.17551	1.96094
Tal1::Gata1	0.289474	0.297872	3.071	6.677	0.888974	1.98889	1.76807
Nr2e3	0.236842	0.276596	4.256	6.318	1.008	1.74753	1.76151
PLAG1	0.131579	0.106383	10.408	10.931	1.36947	1.16287	1.59252
Sox2	0.184211	0.12766	9.297	7.042	1.71261	0.898979	1.5396
ELK1	0.578947	0.659574	0.546	7.087	0.316105	4.6744	1.4776
HNF1A	0.157895	0.0851064	7.911	7.975	1.24911	0.678723	0.847797
T	0.0789474	0.106383	9.563	9.142	0.754974	0.972553	0.734252
RREB1	0.0789474	0.0851064	6.795	13.572	0.536447	1.15506	0.619631
Evi1	0.105263	0.0851064	6.792	7.745	0.714947	0.659149	0.471257
IRF2	0.0263158	0.106383	8.571	19.2	0.225553	2.04255	0.460703
HNF1B	0.157895	0.0851064	6.32	5.141	0.997895	0.437532	0.436611
TLX1::NFIC	0.0789474	0.0425532	12.471	10.35	0.984553	0.440426	0.433622
Pax5	0.0789474	0.0638298	9.105	8.94	0.718816	0.570638	0.410184
RORA_2	0.105263	0.191489	1.22	9.675	0.128421	1.85266	0.23792
NR1H2::RXRA	0.0263158	0.0212766	15.216	15.015	0.400421	0.319468	0.127922
Pax6	0.0263158	0.0851064	3.868	11.383	0.101789	0.968766	0.0986102
REST	0.0263158	0.0212766	11.257	12.085	0.296237	0.257128	0.0761707
MIZF	0.0526316	0.0638298	3.701	5.788	0.194789	0.369447	0.0719643
ESR1	0.0263158	0.0212766	9.367	10.155	0.2465	0.216064	0.0532597
EWSR1-FLI1	0	0.0212766	4.555	12.345	0	0.26266	0
GABPA	0.342105	0.382979	0	5.438	0	2.08264	0
Nkx2-5	0.736842	0.787234	6.615	0	4.87421	0	0
PPARG	0	0	5.477	6.991	0	0	0
Pax4	0	0	4.674	6.518	0	0	0
RXRA::VDR	0	0.0638298	3.649	15.796	0	1.00826	0
TP53	0	0.0212766	5.823	35.714	0	0.759872	0
znf143	0	0.0425532	0.094	5.669	0	0.241234	0

## Sheet: Irreversible
Irreversible
TF	HitScore_Human	HitScore_Mouse	norm_Z_score_Human	norm_Z_score_Mouse	TF_ProminenceScore_Z_Human	TF_ProminenceScore_Z_Mouse	CombinedProminenceScore_Z
ZNF354C	0.9375	0.854545	18.243	15.265	17.1028	13.0446	223.1
ELF5	0.833333	0.836364	15.429	17.149	12.8575	14.3428	184.413
SPIB	0.833333	0.836364	16.44	15.966	13.7	13.3534	182.941
MZF1_1-4	0.833333	0.890909	11.365	21.623	9.47083	19.2641	182.447
FEV	0.729167	0.727273	16.026	19.174	11.6856	13.9447	162.953
RUNX1	0.708333	0.745455	13.042	19.704	9.23808	14.6884	135.693
AP1	0.770833	0.854545	12.374	15.837	9.53829	13.5334	129.086
ZEB1	0.770833	0.818182	12.705	14.628	9.79344	11.9684	117.211
Gfi	0.708333	0.672727	15.465	15.559	10.9544	10.467	114.659
SPI1	0.666667	0.781818	10.911	19.891	7.274	15.5511	113.119
Tcfcp2l1	0.541667	0.545455	19.337	18.306	10.4742	9.98509	104.586
Myf	0.5625	0.6	15.776	19.492	8.874	11.6952	103.783
EBF1	0.520833	0.563636	14.828	22.91	7.72292	12.9129	99.7253
CEBPA	0.625	0.709091	12.091	17.821	7.55687	12.6367	95.494
Klf4	0.6875	0.654545	9.286	21.888	6.38413	14.3267	91.4634
YY1	0.8125	0.818182	11.954	10.534	9.71262	8.61873	83.7105
Nkx3-2	0.708333	0.727273	12.242	13.199	8.67142	9.59927	83.2393
NR4A2	0.6875	0.690909	10.175	16.793	6.99531	11.6024	81.1627
Myb	0.666667	0.654545	12.545	14.552	8.36333	9.52495	79.6603
SP1	0.604167	0.690909	10.484	17.81	6.33408	12.3051	77.9415
NFATC2	0.708333	0.709091	13.144	10.57	9.31033	7.49509	69.7818
SRY	0.666667	0.745455	10.739	11.733	7.15933	8.74642	62.6185
Sox5	0.645833	0.727273	10.466	12.548	6.75929	9.12582	61.6841
Sox17	0.6875	0.709091	13.222	9.45	9.09013	6.70091	60.9121
ELK1	0.5625	0.690909	7.389	20.611	4.15631	14.2403	59.1873
Nkx2-5	0.729167	0.890909	10.414	7.738	7.59354	6.89385	52.3488
Arnt::Ahr	0.604167	0.727273	8.896	12.915	5.37467	9.39273	50.4828
USF1	0.4375	0.527273	11.234	19.055	4.91488	10.0472	49.3806
ARID3A	0.6875	0.8	11.07	7.849	7.61063	6.2792	47.7886
MZF1_5-13	0.583333	0.690909	6.772	17.284	3.95033	11.9417	47.1736
Gata1	0.604167	0.727273	10.34	10.239	6.24708	7.44655	46.5192
Prrx2	0.625	0.727273	9.354	10.87	5.84625	7.90545	46.2173
Hand1::Tcfe2a	0.604167	0.781818	5.799	16.593	3.50356	12.9727	45.4507
HOXA5	0.791667	0.854545	9.815	6.451	7.77021	5.51267	42.8346
Stat3	0.416667	0.509091	12.422	14.852	5.17583	7.56102	39.1346
HIF1A::ARNT	0.458333	0.509091	11.562	13.476	5.29925	6.86051	36.3556
Pdx1	0.708333	0.690909	7.982	9.231	5.65392	6.37778	36.0594
Nobox	0.625	0.672727	8.695	9.351	5.43437	6.29067	34.1859
Zfx	0.416667	0.381818	13.94	14.682	5.80833	5.60585	32.5607
MAX	0.354167	0.454545	10.369	19.001	3.67235	8.63682	31.7175
REL	0.416667	0.527273	9.369	13.758	3.90375	7.25422	28.3187
CREB1	0.291667	0.563636	10.163	16.514	2.96421	9.30789	27.5905
FOXD1	0.541667	0.636364	7.431	9.782	4.02512	6.22491	25.056
HNF4A	0.291667	0.381818	11.191	19.637	3.26404	7.49776	24.473
NF-kappaB	0.416667	0.381818	11.633	13.172	4.84708	5.02931	24.3775
TAL1::TCF3	0.375	0.327273	13.987	14.167	5.24512	4.63647	24.3189
E2F1	0.416667	0.309091	12.114	15.474	5.0475	4.78287	24.1416
SOX9	0.520833	0.6	7.48	10.305	3.89583	6.183	24.0879
NFYA	0.3125	0.327273	11.805	19.781	3.68906	6.47378	23.8822
Esrrb	0.458333	0.490909	12.027	8.805	5.51237	4.32245	23.827
GABPA	0.354167	0.436364	10.115	14.907	3.5824	6.50487	23.303
FOXO3	0.541667	0.636364	6.259	10.612	3.39029	6.75309	22.8949
NFE2L2	0.291667	0.290909	13.041	18.75	3.80363	5.45455	20.747
NKX3-1	0.479167	0.636364	8.837	7.66	4.2344	4.87455	20.6408
Zfp423	0.229167	0.290909	15.006	19.631	3.43887	5.71084	19.6389
PPARG::RXRA	0.229167	0.381818	9.873	21.048	2.26256	8.03651	18.1831
INSM1	0.229167	0.418182	10.211	17.838	2.34002	7.45953	17.4554
Foxa2	0.479167	0.563636	5.678	10.564	2.72071	5.95425	16.1998
RELA	0.333333	0.381818	8.618	14.499	2.87267	5.53598	15.903
Nr2e3	0.270833	0.327273	11.827	14.955	3.20315	4.89436	15.6774
TBP	0.354167	0.545455	8.649	9.06	3.06319	4.94182	15.1377
IRF1	0.25	0.309091	11.47	16.374	2.8675	5.06105	14.5126
Arnt	0.270833	0.381818	8.15	16.683	2.20729	6.36987	14.0602
Mycn	0.3125	0.4	7.827	13.844	2.44594	5.5376	13.5446
TEAD1	0.25	0.254545	11.537	16.757	2.88425	4.26542	12.3025
FOXA1	0.583333	0.672727	4.172	7.477	2.43367	5.02998	12.2413
RORA_1	0.333333	0.472727	5.185	13.724	1.72833	6.48771	11.2129
Ddit3::Cebpa	0.291667	0.254545	9.419	13.427	2.74721	3.41778	9.38936
STAT1	0.291667	0.254545	13.452	9	3.9235	2.29091	8.98838
RORA_2	0.25	0.181818	13.855	13.435	3.46375	2.44273	8.461
Foxd3	0.416667	0.6	4.403	7.676	1.83458	4.6056	8.44936
Spz1	0.3125	0.309091	8.638	9.751	2.69937	3.01395	8.13577
NHLH1	0.25	0.254545	10.048	12.477	2.512	3.17596	7.97802
ELK4	0.208333	0.254545	12.861	11.27	2.67937	2.86873	7.6864
FOXF2	0.1875	0.236364	8.435	19.479	1.58156	4.60413	7.28172
Egr1	0.270833	0.236364	10.465	10.581	2.83427	2.50096	7.08841
Myc	0.270833	0.4	4.476	13.562	1.21225	5.4248	6.57621
NR2F1	0.1875	0.181818	10.214	18.459	1.91512	3.35618	6.42751
HLF	0.208333	0.254545	8.292	12.669	1.7275	3.22484	5.5709
MEF2A	0.25	0.272727	7.732	9.94	1.933	2.71091	5.24019
Lhx3	0.25	0.2	10.481	8.953	2.62025	1.7906	4.69182
Pou5f1	0.125	0.181818	12.417	15.088	1.55212	2.74327	4.2579
Foxq1	0.270833	0.345455	5.346	8.332	1.44787	2.87833	4.16746
MYC::MAX	0.125	0.181818	10.164	14.71	1.2705	2.67455	3.39801
NFIL3	0.25	0.236364	6.207	8.843	1.55175	2.09016	3.24341
Tal1::Gata1	0.208333	0.218182	6.901	8.241	1.43771	1.79804	2.58505
IRF2	0.0833333	0.0727273	16.876	20.022	1.40633	1.45615	2.04783
PBX1	0.0833333	0.163636	10.181	11.04	0.848417	1.80655	1.5327
HNF1A	0.104167	0.145455	6.767	14.503	0.704896	2.10953	1.487
ESR2	0.125	0.0909091	11.487	10.689	1.43587	0.971727	1.39528
PLAG1	0.0833333	0.0909091	8.496	16.79	0.708	1.52636	1.08067
NFKB1	0.125	0.127273	4.848	12.777	0.606	1.62616	0.985455
Sox2	0.104167	0.0909091	10.754	9.632	1.12021	0.875636	0.980895
CTCF	0.104167	0.0727273	10.479	11.64	1.09156	0.846545	0.924057
Evi1	0.0833333	0.0727273	10.262	11.856	0.855167	0.862255	0.737371
Pax5	0.0833333	0.0363636	13.61	13.035	1.13417	0.474	0.537595
NR3C1	0.0833333	0.0727273	7.982	10.517	0.665167	0.764873	0.508768
RREB1	0.0416667	0.0727273	6.075	17.423	0.253125	1.26713	0.320742
MIZF	0.0416667	0.0727273	5.618	15.301	0.234083	1.1128	0.260488
T	0.0416667	0.0727273	6.264	13.261	0.261	0.964436	0.251718
RXR::RAR_DR5	0.104167	0.0181818	14.962	7.946	1.55854	0.144473	0.225167
znf143	0.0208333	0.0727273	4.803	16.897	0.100062	1.22887	0.122964
Ar	0.0208333	0.0363636	9.327	16.287	0.194312	0.592255	0.115082
Pax6	0.0416667	0.0181818	8.177	9.144	0.340708	0.166255	0.0566443
TLX1::NFIC	0.0208333	0.0181818	6.526	9.905	0.135958	0.180091	0.0244849
ESR1	0	0.0363636	5.802	19.42	0	0.706182	0
EWSR1-FLI1	0	0	6.74	10.594	0	0	0
FOXI1	0.520833	0.545455	5.602	0	2.91771	0	0
HNF1B	0.0625	0.109091	0	9.956	0	1.08611	0
NR1H2::RXRA	0	0	7.515	11.353	0	0	0
PPARG	0	0	7.708	11.58	0	0	0
Pax4	0	0	6.864	11.086	0	0	0
REST	0	0.0181818	6.337	16.393	0	0.298055	0
RXRA::VDR	0.0208333	0	9.916	9.347	0.206583	0	0
SRF	0	0.0363636	4.699	17.633	0	0.6412	0
TP53	0	0	8.113	12.309	0	0	0
